# Supplementary material for: Effect of Infraorbital and/or Infratrochlear Nerve Blocks on Postoperative Care in Patients with Septorhinoplasty: A Meta-Analysis
Source: MDPI journal article supplement (doi:10.3390/medicina59091659), 2023-09-14
Supplement: s1 [file s1]

**Table S1. Search terms and queries.**

| Database | Search         | Search terms/queries                                                                                                                                                                                                                                                                                                                                                                                                                                                                                                                                                                                                                                                |
|----------|----------------|---------------------------------------------------------------------------------------------------------------------------------------------------------------------------------------------------------------------------------------------------------------------------------------------------------------------------------------------------------------------------------------------------------------------------------------------------------------------------------------------------------------------------------------------------------------------------------------------------------------------------------------------------------------------|
| PubMed   | #1             | "Rhinoplasty"[Mesh]                                                                                                                                                                                                                                                                                                                                                                                                                                                                                                                                                                                                                                                 |
|          | #2             | "Rhinoplasty"[TW] OR "Rhinoplasties"[TW] OR "rhinoseptoplasty"[TW] OR "septorhinoplasty"[TW]                                                                                                                                                                                                                                                                                                                                                                                                                                                                                                                                                                        |
|          | #3<br>Combine  | #1 OR #2                                                                                                                                                                                                                                                                                                                                                                                                                                                                                                                                                                                                                                                            |
|          | #4             | "Nerve Block"[Mesh]                                                                                                                                                                                                                                                                                                                                                                                                                                                                                                                                                                                                                                                 |
|          | #5             | "Nerve Block"[TW] OR "Block, Nerve"[TW] OR "Blocks, Nerve"[TW] OR "Nerve Blocks"[TW] OR "Nerve Blockade"[TW] OR "Blockade, Nerve"[TW] OR "Blockades, Nerve"[TW] OR "Nerve Blockades"[TW] OR "Chemical Neurolysis"[TW] OR "Chemical Neurolyses"[TW] OR "Neurolyses, Chemical"[TW] OR "Neurolysis, Chemical"[TW] OR "Chemodenervation"[TW] OR "Chemodenervations"[TW] OR "infraorbital nerve block"[TW] OR "infraorbital nerve"[TW] OR "infratrochlear nerve block"[TW] OR "infratrochlear nerve"[TW]                                                                                                                                                                 |
|          | #6             | "Pain"[Mesh]                                                                                                                                                                                                                                                                                                                                                                                                                                                                                                                                                                                                                                                        |
|          | #7             | "Pain"[TW] OR "Pain, Burning"[TW] OR "Burning Pain"[TW] OR "Burning Pains"[TW] OR "Pains, Burning"[TW] OR "Suffering, Physical"[TW] OR "Physical Suffering"[TW] OR "Physical Sufferings"[TW] OR "Sufferings, Physical"[TW] OR "Pain, Migratory"[TW] OR "Migratory Pain"[TW] OR "Migratory Pains"[TW] OR "Pains, Migratory"[TW] OR "Pain, Radiating"[TW] OR "Pains, Radiating"[TW] OR "Radiating Pain"[TW] OR "Radiating Pains"[TW] OR "Pain, Splitting"[TW] OR "Pains, Splitting"[TW] OR "Splitting Pain"[TW] OR "Splitting Pains"[TW] OR "Ache"[TW] OR "Aches"[TW] OR "Pain, Crushing"[TW] OR "Crushing Pain"[TW] OR "Crushing Pains"[TW] OR "Pains, Crushing"[TW] |
|          | #8<br>Combine  | #4 OR #5 OR #6 OR #7                                                                                                                                                                                                                                                                                                                                                                                                                                                                                                                                                                                                                                                |
|          | #9<br>Combine  | #3 AND #8                                                                                                                                                                                                                                                                                                                                                                                                                                                                                                                                                                                                                                                           |
|          | #10<br>Combine | #9 NOT ("animals"[MeSH] NOT "Humans"[MeSH])                                                                                                                                                                                                                                                                                                                                                                                                                                                                                                                                                                                                                         |

| Database | Search        | Search terms/queries                                                                                                         |
|----------|---------------|------------------------------------------------------------------------------------------------------------------------------|
| EMBASE   | #1            | "rhinoplasty"/exp                                                                                                            |
|          | #2            | "Rhinoplasty":ti,ab,kw,de OR "Rhinoplasties":ti,ab,kw,de OR "rhinoseptoplasty":ti,ab,kw,de OR "septorhinoplasty":ti,ab,kw,de |
|          | #3<br>Combine | #1 OR #2                                                                                                                     |
|          | #4            | "nerve block"/exp                                                                                                            |

|  |                |                                                                                                                                                                                                                                                                                                                                                                                                                                                                                                                                                                                                                                                                                                                                                                                                                                                                                             |
|--|----------------|---------------------------------------------------------------------------------------------------------------------------------------------------------------------------------------------------------------------------------------------------------------------------------------------------------------------------------------------------------------------------------------------------------------------------------------------------------------------------------------------------------------------------------------------------------------------------------------------------------------------------------------------------------------------------------------------------------------------------------------------------------------------------------------------------------------------------------------------------------------------------------------------|
|  | #5             | "Nerve Block":ti,ab,kw,de OR "Block, Nerve":ti,ab,kw,de OR "Blocks, Nerve":ti,ab,kw,de OR "Nerve Blocks":ti,ab,kw,de OR "Nerve Blockade":ti,ab,kw,de OR "Blockade, Nerve":ti,ab,kw,de OR "Blockades, Nerve":ti,ab,kw,de OR "Nerve Blockades":ti,ab,kw,de OR "Chemical Neurolysis":ti,ab,kw,de OR "Chemical Neurolyses":ti,ab,kw,de OR "Neurolyses, Chemical":ti,ab,kw,de OR "Neurolysis, Chemical":ti,ab,kw,de OR "Chemodeneration":ti,ab,kw,de OR "Chemodenervations":ti,ab,kw,de OR "infraorbital nerve block":ti,ab,kw,de OR "infraorbital nerve":ti,ab,kw,de OR "infratrochlear nerve block":ti,ab,kw,de OR "infratrochlear nerve":ti,ab,kw,de                                                                                                                                                                                                                                          |
|  | #6             | "pain"/exp                                                                                                                                                                                                                                                                                                                                                                                                                                                                                                                                                                                                                                                                                                                                                                                                                                                                                  |
|  | #7             | "Pain":ti,ab,kw,de OR "Pain, Burning":ti,ab,kw,de OR "Burning Pain":ti,ab,kw,de OR "Burning Pains":ti,ab,kw,de OR "Pains, Burning":ti,ab,kw,de OR "Suffering, Physical":ti,ab,kw,de OR "Physical Suffering":ti,ab,kw,de OR "Physical Sufferings":ti,ab,kw,de OR "Sufferings, Physical":ti,ab,kw,de OR "Pain, Migratory":ti,ab,kw,de OR "Migratory Pain":ti,ab,kw,de OR "Migratory Pains":ti,ab,kw,de OR "Pains, Migratory":ti,ab,kw,de OR "Pain, Radiating":ti,ab,kw,de OR "Pains, Radiating":ti,ab,kw,de OR "Radiating Pain":ti,ab,kw,de OR "Radiating Pains":ti,ab,kw,de OR "Pain, Splitting":ti,ab,kw,de OR "Pains, Splitting":ti,ab,kw,de OR "Splitting Pain":ti,ab,kw,de OR "Splitting Pains":ti,ab,kw,de OR "Ache":ti,ab,kw,de OR "Aches":ti,ab,kw,de OR "Pain, Crushing":ti,ab,kw,de OR "Crushing Pain":ti,ab,kw,de OR "Crushing Pains":ti,ab,kw,de OR "Pains, Crushing":ti,ab,kw,de |
|  | #8<br>Combine  | #4 OR #5 OR #6 OR #7                                                                                                                                                                                                                                                                                                                                                                                                                                                                                                                                                                                                                                                                                                                                                                                                                                                                        |
|  | #9<br>Combine  | #3 AND #8                                                                                                                                                                                                                                                                                                                                                                                                                                                                                                                                                                                                                                                                                                                                                                                                                                                                                   |
|  | #10<br>Combine | #9 NOT ('animal'/exp NOT 'human'/exp)                                                                                                                                                                                                                                                                                                                                                                                                                                                                                                                                                                                                                                                                                                                                                                                                                                                       |

| Database         | Search        | Search terms/queries                                                                                                                                                                                                                                                                                                                                                                                                                                                                                                                                                                         |
|------------------|---------------|----------------------------------------------------------------------------------------------------------------------------------------------------------------------------------------------------------------------------------------------------------------------------------------------------------------------------------------------------------------------------------------------------------------------------------------------------------------------------------------------------------------------------------------------------------------------------------------------|
| Cochrane Library | #1            | [mh "Rhinoplasty"]                                                                                                                                                                                                                                                                                                                                                                                                                                                                                                                                                                           |
|                  | #2            | "Rhinoplasty":ti,ab,kw OR "Rhinoplasties":ti,ab,kw OR "rhinoseptoplasty":ti,ab,kw OR "septorhinoplasty":ti,ab,kw                                                                                                                                                                                                                                                                                                                                                                                                                                                                             |
|                  | #3<br>Combine | #1 OR #2                                                                                                                                                                                                                                                                                                                                                                                                                                                                                                                                                                                     |
|                  | #4            | [mh "Nerve Block"]                                                                                                                                                                                                                                                                                                                                                                                                                                                                                                                                                                           |
|                  | #5            | "Nerve Block":ti,ab,kw OR "Block, Nerve":ti,ab,kw OR "Blocks, Nerve":ti,ab,kw OR "Nerve Blocks":ti,ab,kw OR "Nerve Blockade":ti,ab,kw OR "Blockade, Nerve":ti,ab,kw OR "Blockades, Nerve":ti,ab,kw OR "Nerve Blockades":ti,ab,kw OR "Chemical Neurolysis":ti,ab,kw OR "Chemical Neurolyses":ti,ab,kw OR "Neurolyses, Chemical":ti,ab,kw OR "Neurolysis, Chemical":ti,ab,kw OR "Chemodeneration":ti,ab,kw OR "Chemodenervations":ti,ab,kw OR "infraorbital nerve block":ti,ab,kw OR "infraorbital nerve":ti,ab,kw OR "infratrochlear nerve block":ti,ab,kw OR "infratrochlear nerve":ti,ab,kw |
|                  | #6            | [mh "Pain"]                                                                                                                                                                                                                                                                                                                                                                                                                                                                                                                                                                                  |

|  |               |                                                                                                                                                                                                                                                                                                                                                                                                                                                                                                                                                                                                                                                                                                                                                                                                            |
|--|---------------|------------------------------------------------------------------------------------------------------------------------------------------------------------------------------------------------------------------------------------------------------------------------------------------------------------------------------------------------------------------------------------------------------------------------------------------------------------------------------------------------------------------------------------------------------------------------------------------------------------------------------------------------------------------------------------------------------------------------------------------------------------------------------------------------------------|
|  | #7            | "Pain":ti,ab,kw OR "Pain, Burning":ti,ab,kw OR "Burning Pain":ti,ab,kw OR "Burning Pains":ti,ab,kw OR "Pains, Burning":ti,ab,kw OR "Suffering, Physical":ti,ab,kw OR "Physical Suffering":ti,ab,kw OR "Physical Sufferings":ti,ab,kw OR "Sufferings, Physical":ti,ab,kw OR "Pain, Migratory":ti,ab,kw OR "Migratory Pain":ti,ab,kw OR "Migratory Pains":ti,ab,kw OR "Pains, Migratory":ti,ab,kw OR "Pain, Radiating":ti,ab,kw OR "Pains, Radiating":ti,ab,kw OR "Radiating Pain":ti,ab,kw OR "Radiating Pains":ti,ab,kw OR "Pain, Splitting":ti,ab,kw OR "Pains, Splitting":ti,ab,kw OR "Splitting Pain":ti,ab,kw OR "Splitting Pains":ti,ab,kw OR "Ache":ti,ab,kw OR "Aches":ti,ab,kw OR "Pain, Crushing":ti,ab,kw OR "Crushing Pain":ti,ab,kw OR "Crushing Pains":ti,ab,kw OR "Pains, Crushing":ti,ab,kw |
|  | #8<br>Combine | #4 OR #5 OR #6 OR #7                                                                                                                                                                                                                                                                                                                                                                                                                                                                                                                                                                                                                                                                                                                                                                                       |
|  | #9<br>Combine | #3 AND #8                                                                                                                                                                                                                                                                                                                                                                                                                                                                                                                                                                                                                                                                                                                                                                                                  |

| Database       | Search        | Search terms/queries                                                                                                                                                                                                                                                                         |
|----------------|---------------|----------------------------------------------------------------------------------------------------------------------------------------------------------------------------------------------------------------------------------------------------------------------------------------------|
| Web of Science | #1            | TS=("Rhinoplasty" OR "Rhinoplasties" OR "rhinoseptoplasty" OR "septorhinoplasty")                                                                                                                                                                                                            |
|                | #2            | TS=("Nerve Block" OR "Nerve Blocks" OR "Nerve Blockade" OR "Nerve Blockades" OR "Chemical Neurolysis" OR "Chemical Neurolyses" OR "Chemodenervation" OR "Chemodenervations" OR "infraorbital nerve block" OR "infraorbital nerve" OR "infratrochlear nerve block" OR "infratrochlear nerve") |
|                | #3            | TS=("Pain" OR "Burning Pain" OR "Burning Pains" OR "Physical Suffering" OR "Physical Sufferings" OR "Migratory Pain" OR "Migratory Pains" OR "Radiating Pain" OR "Radiating Pains" OR "Splitting Pain" OR "Splitting Pains" OR "Ache" OR "Aches" OR "Crushing Pain" OR "Crushing Pains")     |
|                | #4            | #2 OR #3                                                                                                                                                                                                                                                                                     |
|                | #5<br>Combine | #1 AND #4                                                                                                                                                                                                                                                                                    |

| Database       | Search        | Search terms/queries                                                                                                                                                                                                                                                |
|----------------|---------------|---------------------------------------------------------------------------------------------------------------------------------------------------------------------------------------------------------------------------------------------------------------------|
| Google Scholar | #1            | ("Rhinoplasty" OR "Rhinoplasties" OR "rhinoseptoplasty" OR "septorhinoplasty")                                                                                                                                                                                      |
|                | #2            | ("Nerve Block" OR "Nerve Blockade" OR "Chemical Neurolysis" OR "Chemodenervation" OR "infraorbital nerve" OR "infratrochlear nerve" OR "Pain" OR "Physical Suffering" OR "Ache")                                                                                    |
|                | #3<br>Combine | ("Rhinoplasty" OR "Rhinoplasties" OR "rhinoseptoplasty" OR "septorhinoplasty") AND ("Nerve Block" OR "Nerve Blockade" OR "Chemical Neurolysis" OR "Chemodenervation" OR "infraorbital nerve" OR "infratrochlear nerve" OR "Pain" OR "Physical Suffering" OR "Ache") |
